# Supplementary material for: Fe3O4@chitosan-tannic acid bionanocomposite as a novel nanocatalyst for the synthesis of pyranopyrazoles
Source: PubMed Central journal article supplement (PMC8501051; doi:10.1038/s41598-021-99121-2), 2021-10-08
Supplement: 41598_2021_99121_MOESM1_ESM.pdf [file 41598_2021_99121_MOESM1_ESM.pdf]

# **Fe<sub>3</sub>O<sub>4</sub>@chitosan-tannic acid bionanocomposite as a novel nanocatalyst for the synthesis of pyranopyrazoles**

Maryam Kamalzare <sup>a,b</sup>, Mohammad Reza Ahghari <sup>b</sup>, Mohammad Bayat <sup>\*,a</sup> and Ali Maleki <sup>\*,b</sup>

<sup>a</sup>Department of Chemistry, Faculty of Science, Imam Khomeini International University, Qazvin, Iran. E-mail: bayat\_mo@yahoo.com, m.bayat@sci.ikiu.ac.ir; Tel: +98 (28)33780040

<sup>b</sup>Catalysts and Organic Synthesis Research Laboratory, Department of Chemistry, Iran University of Science and Technology, Tehran 16846-13114, Iran. E-mail: maleki@iust.ac.ir; Fax: +98 21 73021584; Tel: +98 21 73228313

---

## **Table of contents**

---

| <b>Subject</b>                                                                                                                                 | <b>Page</b> |
|------------------------------------------------------------------------------------------------------------------------------------------------|-------------|
| <b>Table S1.</b> Magnetic parameters of Fe <sub>3</sub> O <sub>4</sub> and Fe <sub>3</sub> O <sub>4</sub> @chitosan-tannic acid .....          | S2          |
| <b>Table S2.</b> Optimization of the reaction conditions in the synthesis of product <b>(5a)</b> .....                                         | S2          |
| <b>Figure S1.</b> Elemental mapping of Fe <sub>3</sub> O <sub>4</sub> @chitosan-tannic acid bionanocomposite .....                             | S3          |
| <b>Figure S2.</b> Reusability of the Fe <sub>3</sub> O <sub>4</sub> @chitosan-tannic acid bionanocomposite .....                               | S3          |
| <b>Figure S3.</b> XRD patterns of the Fe <sub>3</sub> O <sub>4</sub> @chitosan-tannic acid bionanocomposite and recycled bionanocomposite..... | S4          |
| <b>Figure S4.</b> EDX analysis of the recycled Fe <sub>3</sub> O <sub>4</sub> @chitosan-tannic acid bionanocomposite.....                      | S4          |
| <b>Figure S5.</b> <sup>1</sup> H NMR spectrum of the product <b>(5g)</b> .....                                                                 | S5          |
| <b>Figure S6.</b> <sup>13</sup> C NMR spectrum of the product <b>(5g)</b> .....                                                                | S6          |

---

**Table S1.** Magnetic parameters of Fe<sub>3</sub>O<sub>4</sub> and Fe<sub>3</sub>O<sub>4</sub>@chitosan-tannic acid

| Sample                                               | Ms (emu/g) | Mr (emu/g) | Hc (Oe) |
|------------------------------------------------------|------------|------------|---------|
| Fe <sub>3</sub> O <sub>4</sub>                       | 56.07      | 2.12       | 27.03   |
| Fe <sub>3</sub> O <sub>4</sub> @chitosan-tannic acid | 36.54      | 6.1        | 80.02   |

**Table S2.** Optimization of the reaction conditions for the synthesis of pyranopyrazole derivatives

| Entry | Solvent | Temperature | Catalyst (mg) | Yield (%) |
|-------|---------|-------------|---------------|-----------|
| 1     | Water   | r.t.        | -             | Trace     |
| 2     | Ethanol | r.t.        | -             | Trace     |
| 3     | Ethanol | r.t.        | 10            | 69        |
| 4     | Ethanol | r.t.        | 20            | 94        |
| 5     | Ethanol | r.t.        | 30            | 93        |
| 6     | Ethanol | Reflux      | 10            | 89        |

|   |              |        |    |    |
|---|--------------|--------|----|----|
| 7 | Ethanol      | Reflux | 20 | 90 |
| 8 | Acetonitrile | r.t.   | 20 | 78 |

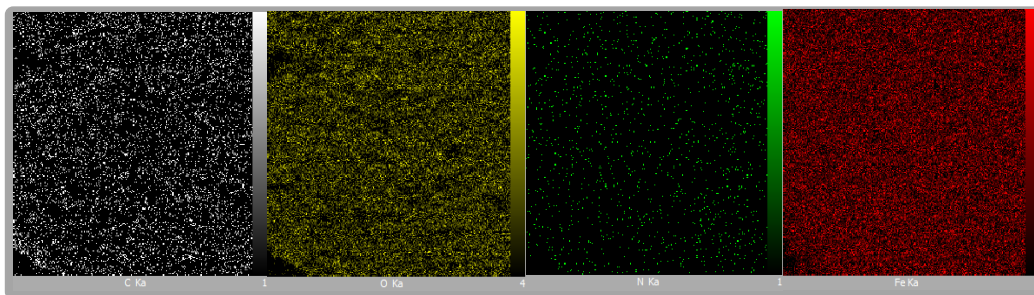

**Figure S1.** Elemental mapping of Fe<sub>3</sub>O<sub>4</sub>@chitosan-tannic acid bionanocomposite

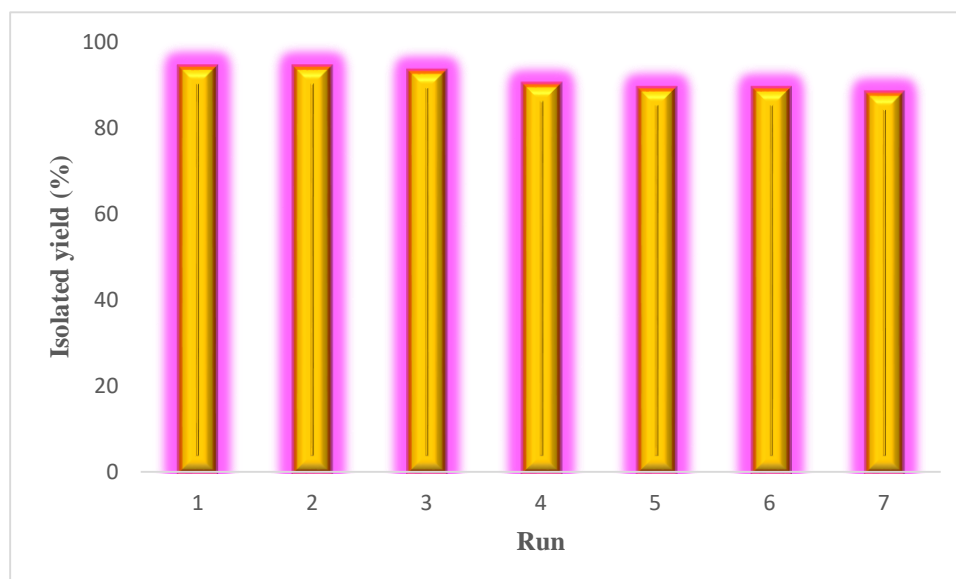

**Figure S2.** Reusability of the Fe<sub>3</sub>O<sub>4</sub>@chitosan-tannic acid bionanocomposite

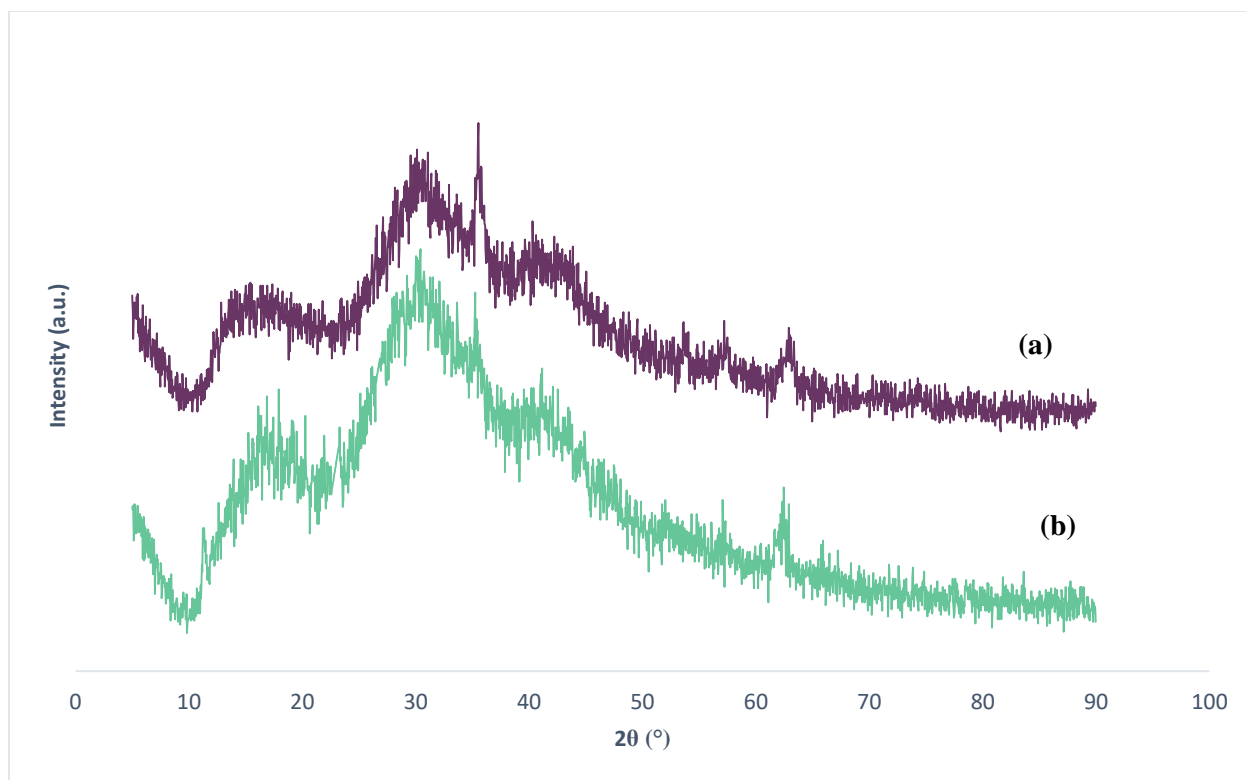

**Figure S3.** XRD patterns of (a)  $\text{Fe}_3\text{O}_4$ @chitosan-tannic acid bionanocomposite; and (b) recycled bionanocomposite

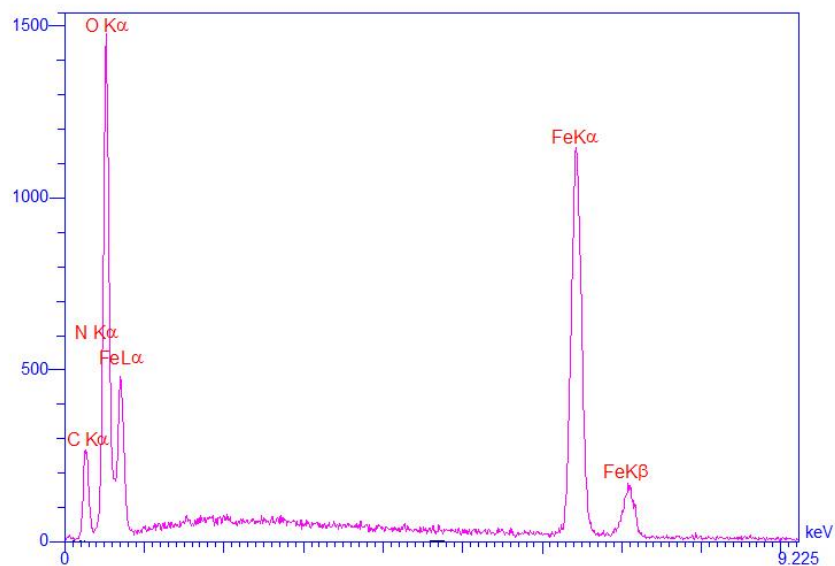

**Figure S4.** EDX analysis of recycled  $\text{Fe}_3\text{O}_4$ @chitosan-tannic acid bionanocomposite

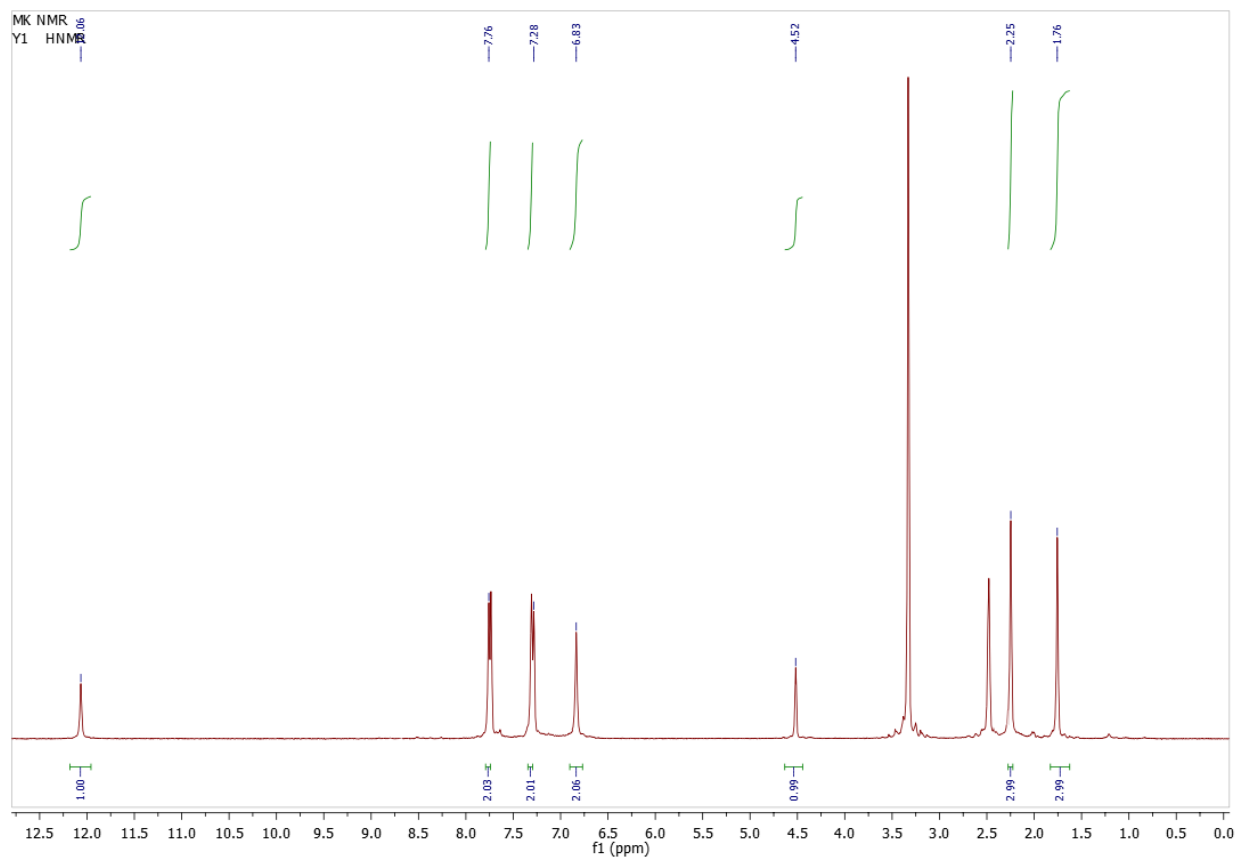

**Figure S5.**  $^1\text{H}$  NMR spectrum of the product **5g**

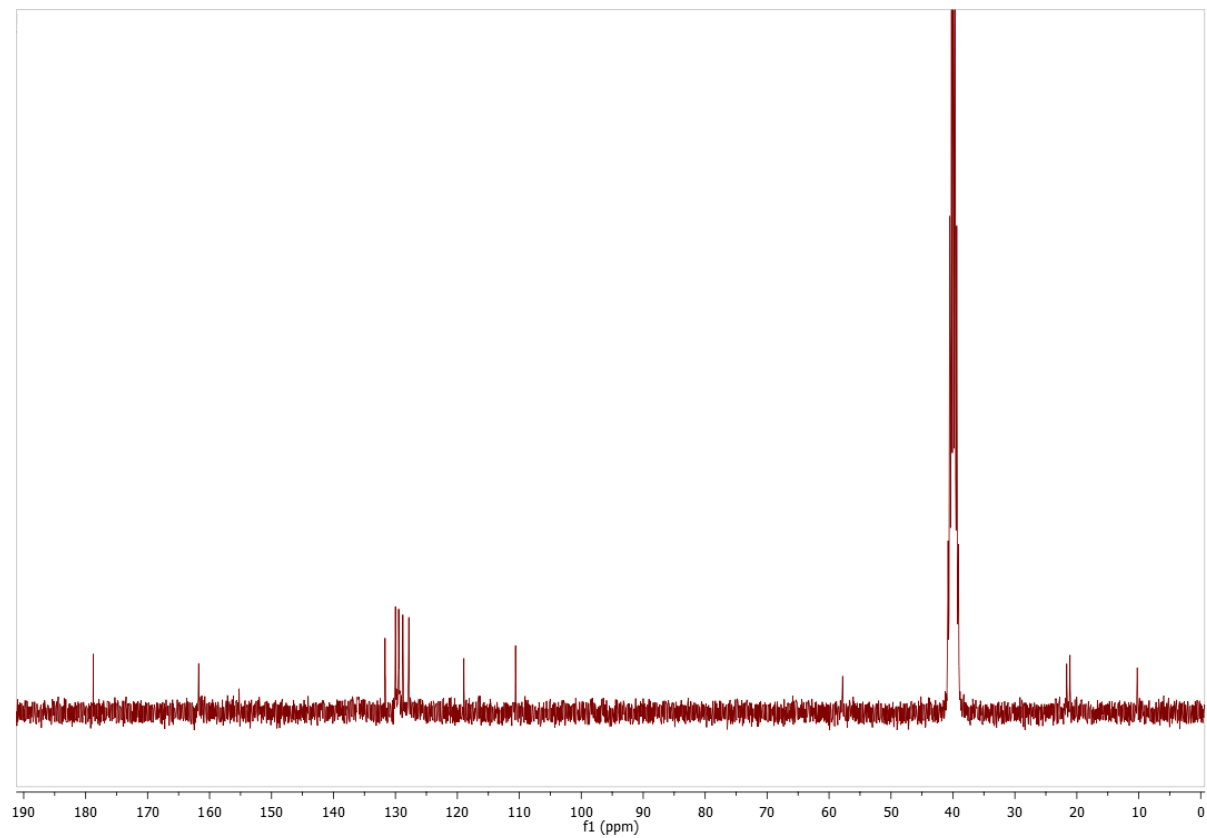

**Figure S6.**  $^{13}\text{C}$  NMR spectrum of the product **5g**

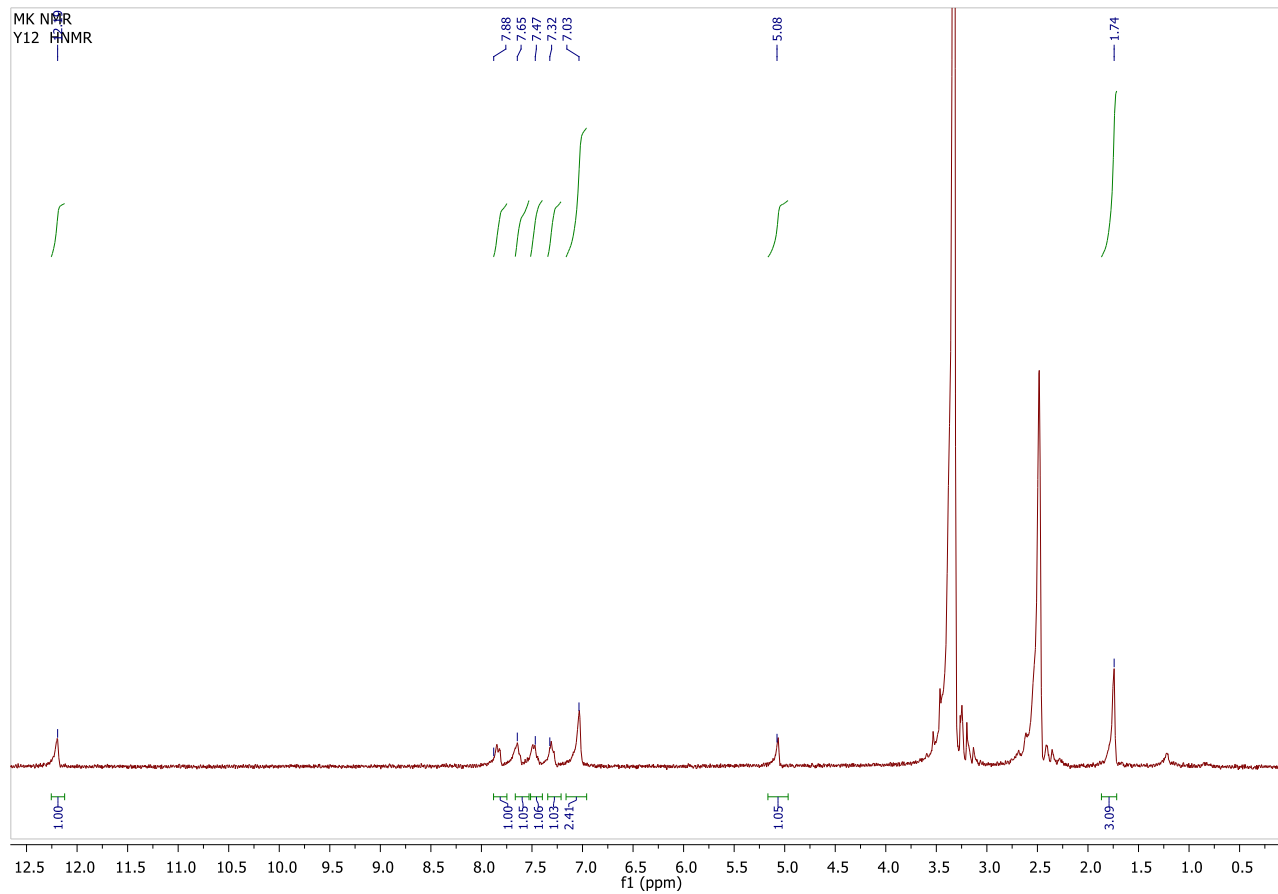

**Figure S7.**  $^1\text{H}$  NMR spectrum of the product **5c**
